# Supplementary material
Source: Elsevier journal article supplement (https://www.sciencedirect.com/science/article/pii/S1698031X18300189)
Supplement: mmc1 [file S1698031X18300189:mmc1.docx]

Apéndice 1*:* Artículos publicados entre 2000-2016 que analizan la experiencia subjetiva del orgasmo

| **Autores** | **Muestra** | **Instrumentos de evaluación** | **Resultados principales** | **Tipo de variables relacionadas con la experiencia subjetiva del orgasmo** |
| --- | --- | --- | --- | --- |
| Abedi, Afrazeh, Javadifar y Saki1 | 228 mujeres | 3 ítems del Female Sexual Function Index (FSFI) | El estrés se relaciona significativamente de forma negativa con la experiencia orgásmica. | Personales |
| Barrientos y Páez2 | 5.407 mujeres y hombres | 1 ítem *ad hoc* sobre la experiencia orgásmica | La satisfacción sexual se asocia de forma positiva con la experiencia orgásmica. | Interpersonales |
| Beaber y Werner3 | 42 mujeres homosexuales y 78 heterosexuales | 3 ítems del Female Sexual Function Index (FSFI) | La experiencia orgásmica se ve afectada por la ansiedad en mujeres heterosexuales pero no en homosexuales. | Personales |
| Bellamy, Gott y Hinchliff4 | 23 mujeres | Entrevistas semiestructuradas | La experiencia orgásmica no tiene una relación directa con la angustia. | Personales |
| Boquiren et al.5 | 127 mujeres supervivientes de cáncer | 3 ítems del Female Sexual Function Index (FSFI) | La imagen corporal tras la enfermedad de cáncer se asocia de forma negativa con la experiencia orgásmica. | Personales |
| Brewer, Abell y Lyons6 | 226 mujeres heterosexuales | Reasons for Pretending Orgasm Inventory (RPOI) | El maquiavelismo en la relación de pareja afecta de forma negativa a la experiencia orgásmica. | Interpersonales |
| Brewer y Hendrie7 | 71 mujeres heterosexuales | Cuestionario *ad hoc* sobre la experiencia orgásmica | La masturbación, los comportamientos sexuales previos al coito y las vocalizaciones durante la relación sexual en pareja influyen positivamente en la experiencia orgásmica en mujeres. | Personales  Interpersonales |
| Brody8 | 27 mujeres | Cuestionario *ad hoc* sobre la experiencia orgásmica | La experiencia orgásmica en las mujeres tiene una relación significativa con la respuesta vaginal. | Personales |
| Brody9 | 1.256 mujeres | 1 ítem *ad hoc* sobre la experiencia orgásmica | La experiencia orgásmica en las mujeres está asociada a mayor satisfacción en la vida sexual, las relaciones de amistad y la salud mental. | Personales  Interpersonales |
| Brody y Costa10 | 94 mujeres | 6 ítems *ad hoc* sobre la experiencia orgásmica | La experiencia orgásmica se asocia de forma negativa con los mecanismos de defensa inmaduros (somatización, aislamiento, disociación, etc.). | Personales |
| Brody, Houde y Hess11 | 70 mujeres universitarias | 5 ítems *ad hoc* sobre experiencia orgásmica | La disminución de la sensibilidad física y los trastornos psicológicos influyen negativamente en la experiencia orgásmica. | Personales |
| Brody, Klapilova y Krejčová12 | 75 mujeres | Cuestionario *ad hoc* sobre la experiencia orgásmica | La edad no se relaciona con la experiencia orgásmica en mujeres. La excitación sexual y la masturbación tienen relación directa con la experiencia orgásmica. | Personales  Interpersonales |
| Brody y Weiss13 | 1.000 mujeres | 7 ítems *ad hoc* sobre la experiencia orgásmica | La concentración mental y las sensaciones físicas durante la relación sexual en pareja se asocian de forma positiva con la experiencia orgásmica. | Personales  Interpersonales |
| Brody y Weiss14 | 1.570 mujeres y hombres | 1 ítem *ad hoc* sobre la experiencia orgásmica | La satisfacción sexual durante la relación sexual en pareja se asocia de forma positiva con la experiencia orgásmica. La experiencia orgásmica se asocia de forma positiva con la salud mental. | Personales  Interpersonales |
| Brody y Weiss15 | 960 hombres | 1 ítem del International Index of Erectile Function (IIEF) | La disfunción eréctil y la eyaculación precoz afectan a la experiencia orgásmica de forma negativa. | Personales |
| Bueno-Robles y Soto-Lesmes16 | 103 mujeres en tratamiento de cáncer de mama | 4 ítems del Sexual Functioning Questionnaire-Women (SFQ-W) | El impacto del tratamiento del cáncer afecta de forma negativa a la experiencia orgásmica. No hay efecto significativo de la ansiedad ni la depresión en la experiencia orgásmica. | Personales |
| Burri, Cherkas y Spector17 | 2.035 mujeres | 2 ítems *ad hoc* sobre la experiencia orgásmica | La inteligencia emocional se relaciona positivamente con la experiencia del orgasmo durante la masturbación. En la relación de pareja esta asociación es menos significativa. | Personales  Interpersonales |
| Carvalheira y Leal18 | 3.687 mujeres | 1 ítem *ad hoc* sobre la experiencia orgásmica | La masturbación se asocia de forma positiva con la experiencia orgásmica. La masturbación temprana es beneficiosa para el orgasmo en la edad adulta. | Personales |
| Carvalheira y Santana19 | 3.672 hombres | 7 ítems de NATSAL (National Survey of Sexual Attitudes and Lifestyles) | La duración de la relación afecta de forma positiva a la experiencia orgásmica. Los antidepresivos se asocian de forma negativa con la experiencia orgásmica. | Personales  Interpersonales |
| Carvalho, Vieira y Nobre20 | 1.993 mujeres | 3 ítems del Female Sexual Function Index (FSFI) | La experiencia orgásmica no se relaciona con deseo ni excitación sexual. | Interpersonales |
| Chou, Huang y Jiann21 | 1.159 hombres usuarios de anfetaminas | 1 ítem del International Index of Erectile Function (IIEF) | La experiencia orgásmica se ve afectada de forma negativa por el uso de anfetaminas. | Personales |
| Christie, Meyerowitz y Maly22 | 425 mujeres hispanas y 252 no hispanas en tratamiento de cáncer de mama y de cuello uterino | 1 ítem *ad hoc* sobre la experiencia orgásmica | La experiencia orgásmica se ve influida por la etnia. Las mujeres hispanas informan que su experiencia orgásmica es más negativa que las no hispanas. | Personales |
| Cohen y Belsky23 | 323 mujeres | 4 ítems *ad hoc* sobre la experiencia orgásmica | La edad y las relaciones de pareja duraderas se asocian de forma positiva, y la evitación de forma negativa, con la experiencia del orgasmo. La ansiedad no se relaciona significativamente. | Personales  Interpersonales |
| Costa y Brody24 | 30 mujeres universitarias | 4 ítems *ad hoc* sobre la experiencia orgásmica | La experiencia orgásmica se relaciona con pasión, amor, satisfacción e intimidad. | Interpersonales |
| Costa y Brody25 | 323 mujeres | 10 ítems *ad hoc* sobre la experiencia orgásmica | Mecanismos de defensa inmaduros y el consumo de alcohol antes de la actividad sexual afectan de forma negativa a la experiencia orgásmica. | Personales |
| Costa y Brody26 | 80 mujeres universitarias | 2 ítems *ad hoc* sobre la experiencia orgásmica | Altos niveles de ansiedad y mala salud mental aparecen asociados de forma negativa a la experiencia orgásmica. | Personales |
| Costa y Brody27 | 143 mujeres y hombres | Cuestionario *ad hoc* sobre la experiencia orgásmica (26 ítems mujeres y 18 ítems hombres) | La variabilidad de la frecuencia cardíaca en reposo tiene relación directa con la experiencia orgásmica en hombres y mujeres. La actividad parasimpática se relaciona con la experiencia orgásmica. | Personales |
| Costa, Oliveira, Pestana y Costa28 | 98 mujeres y 41 hombres | 3 ítems del Female Sexual Function Index (FSFI) y 1 ítem del International Index of Erectile Function (IIEF) | La alteración de los estados mentales está relacionada con la experiencia orgásmica. La hipnosis está asociada a la experiencia orgásmica en mujeres. | Personales |
| Costa, Pestana, Costa y Wittmann29 | 116 mujeres y hombres | Escala Analógica Visual sobre la Experiencia del Orgasmo | La alteración de los estados de conciencia está relacionada con la experiencia orgásmica en mujeres, no así en hombres. | Personales |
| Cuntim y Nobre30 | 191 mujeres | 3 ítems del Female Sexual Function Index (FSFI) | La experiencia orgásmica está asociada de forma negativa con los pensamientos de abuso sexual, el fracaso, la falta de afecto en la pareja, la pasividad, el control sexual y la falta de pensamientos eróticos. | Personales  Interpersonales |
| Cyranowski, Frank, Cherry, Houck y Kupfer31 | 68 mujeres con depresión | 6 ítems del Derogatis Interview for Sexual Function (DISF-SR) | La depresión afecta de forma significativa a la experiencia orgásmica de las mujeres. | Personales |
| De Sutter, Day y Adam32 | 251 mujeres | Orgasmic and Sexual Autobiographical Questionnaire (31 ítems) | La experiencia orgásmica está relacionada con más placer sexual y menos angustia sexual, así como con más pensamientos eróticos durante las relaciones sexuales con la pareja. | Personales  Interpersonales |
| Denes y Afifi33 | 253 mujeres y hombres | Autorregistro sobre la experiencia del orgasmo | La experiencia orgásmica se relaciona con la percepción de mayores beneficios y menos riesgos en el consumo de alcohol. | Personales |
| Denis y Sung-Mook34 | 43 mujeres VIH positivas y 73 mujeres sin VIH | 4 ítems del Sexual Functioning Questionnaire for Women (SFQ) | La experiencia orgásmica se ve afectada de forma negativa en las mujeres con VIH positivo. | Personales |
| Dewinter, Vermeiren, Vanwesenbeeck y Van Nieuwenhuizen35 | 30 adolescentes con autismo y 60 de población general | 1 ítem *ad hoc* sobre la experiencia orgásmica | El trastorno del espectro autista no influye en la experiencia orgásmica, no encontrándose diferencias con la población general. | Personales |
| Dewinter, Vermeiren, Vanwesenbeeck y Van Nieuwenhuizen36 | 43 padres y 43 hijos adolescentes | 1 ítem *ad hoc* sobre la experiencia orgásmica | La subestimación de los padres y el desconocimiento de la experiencia sexual de los adolescentes no influyen en la experiencia orgásmica de los jóvenes. | Personales  Interpersonales |
| Dickstein, Goldstein, Tkachenko y Kreppner37 | 15 mujeres con trastorno orgásmico | 1 ítem del Female Sexual Distress Scale/Desire Arousal Orgasm (FSDS-DAO) | La angustia no se asocia a la experiencia orgásmica en mujeres con trastorno orgásmico. La frustración influye de forma negativa en la experiencia orgásmica. | Personales |
| Dunkley, Dang, Chang y Gorzalka38 | 733 mujeres y hombres | 3 ítems del Female Sexual Function Inventory Revised (FSFI)  y Brief Sexual Function Questionnaire (BSFQ) | La experiencia orgásmica se asocia de forma negativa con los estilos de apego de ansiedad y evitación. | Interpersonales |
| Ellsworth y Bailey39 | 138 mujeres y 121 hombres con relación de pareja | 3 ítems *ad hoc*: frecuencia del orgasmo, frecuencia del fingimiento del orgasmo y respuesta fisiológica | En mujeres, la experiencia orgásmica no se asocia con la fidelidad sexual hacia la pareja. En hombres, no se asocia con la percepción de fidelidad de la pareja. | Interpersonales |
| Fahs40 | 20 mujeres | Entrevistas semiestructuradas con preguntas sobre la experiencia orgásmica | La experiencia orgásmica se relaciona de forma positiva con la conexión con la pareja y de forma negativa con la vergüenza y los sentimientos negativos. | Personales  Interpersonales |
| Flynn et al.41 | 65 mujeres y 44 hombres en tratamiento de cáncer | 1 ítem *ad hoc* sobre la experiencia orgásmica | La experiencia orgásmica no se ve afectada por el tratamiento de cáncer. Los hombres informan que la experiencia orgásmica es más intensa debido a la desesperación y a la incertidumbre en la enfermedad. | Personales |
| Forbes, Baillie y Schniering42 | 518 mujeres y hombres | 3 ítems del Female Sexual Function Index (FSFI) y 1 ítem del International Index of Erectile Function (IIEF) | La depresión y la ansiedad afectan a la experiencia orgásmica más significativamente en mujeres que en hombres. | Personales |
| Frohlich y Meston43 | 47 mujeres universitarias con síntomas depresivos | 1 ítem *ad hoc* sobre la experiencia orgásmica | Los síntomas depresivos inhiben la experiencia orgásmica en mujeres. | Personales |
| Galinsky44 | 3.005 mujeres y hombres | 2 ítems *ad hoc* sobre la experiencia orgásmica | El contacto sexual (besos, caricias, abrazos, etc.) durante la relación sexual en pareja se asocia positivamente con la experiencia orgásmica en hombres y mujeres. | Interpersonales |
| Gallup, Ampel, Wedberg y Pogosjan45 | 54 mujeres universitarias heterosexuales | 4 ítems *ad hoc* sobre experiencia orgásmica en pareja | La experiencia orgásmica se relaciona con la satisfacción sexual y con la frecuencia de las relaciones sexuales; no hay asociación con la edad de inicio de las relaciones sexuales. | Personales  Interpersonales |
| Garcia, Lloyd, Wallen y Fisher46 | 2.850 mujeres y hombres | 1 ítem *ad hoc* sobre la experiencia orgásmica | La experiencia orgásmica no varía según la orientación sexual en los hombres, pero sí cambia en las mujeres. | Personales |
| Gilbert et al.47 | 21 hombres con cáncer | Entrevistas semiestructuradas | La experiencia orgásmica se ve afectada en hombres con tratamiento de cáncer. La relación de pareja afecta a su experiencia orgásmica. | Personales  Interpersonales |
| Goldey, Posh, Bell y van Anders48 | 73 mujeres | Entrevistas individuales, preguntas abiertas sobre experiencia orgásmica | Hay una clara influencia de la edad, la identidad sexual y la orientación sexual en la experiencia del orgasmo. | Personales |
| González, Viáfara, Caba, Molina y Ortiz49 | 231 mujeres | 3 ítems del Female Sexual Function Index (FSFI) | Bajo nivel educativo, poca satisfacción y falta de cercanía emocional con la pareja afectan a la experiencia orgásmica de forma negativa; el deseo y la lubricación se asocian de forma positiva. | Interpersonales  Psicosociales |
| Hamzaoui, Maamri, Ouanes, Meziou y Zalila50 | 30 mujeres | 3 ítems del Female Sexual Function Index (FSFI) | La depresión afecta a la experiencia orgásmica de forma negativa en el 59,31% de los casos. | Personales |
| Haning et al.51 | 417 mujeres y 179 hombres heterosexuales | 2 ítems *ad hoc* sobre la experiencia orgásmica | La experiencia orgásmica está relacionada con la satisfacción sexual en relaciones de pareja a largo plazo. | Interpersonales |
| Harris, Cherkas, Kato, Heiman y Spector52 | 2.632 mujeres gemelas | 1 ítem *ad hoc* sobre la experiencia orgásmica | La inestabilidad emocional, la introversión y no estar abierto a nuevas experiencias se asocian de forma negativa con la experiencia orgásmica. | Personales |
| Harris, Hornsey y Barlow53 | 2 muestras: 339 y 323 mujeres heterosexuales | 3 ítems *ad hoc*: experiencia del orgasmo durante la penetración, sexo oral y estimulación manual | No se encuentra relación entre el sexismo y la experiencia orgásmica en mujeres heterosexuales. | Personales |
| Herbenick y Fortenberry54 | 530 mujeres | 1 ítem *ad hoc* sobre experiencia orgásmica | Hacer ejercicio físico está relacionado con la experiencia orgásmica y el placer sexual. | Personales |
| Herbenick et al.55 | 2.056 mujeres | 3 ítems del Female Sexual Function Index (FSFI) | El uso del vibrador se asocia de forma positiva con la experiencia orgásmica en mujeres. | Personales |
| Höglund, Jern, Sandnabba y Santtila56 | 1.304 hombres y 2.236 mujeres (19 hombres y 73 mujeres asexuales) | 3 ítems del Female Sexual Function Index (FSFI), 1 ítem del International Index of Erectile Function (IIEF) y 1 ítem de tendencia a fingir el orgasmo | No se encuentran diferencias significativas en la experiencia orgásmica entre las personas asexuales y con otras orientaciones sexuales. | Personales |
| Hou et al.57 | 607 mujeres y hombres con esquizofrenia | 2 ítems del Arizona Sexual Experience Scale (ASEX) | El 58,7% de los pacientes con esquizofrenia informan de que su enfermedad influye de forma negativa en la experiencia orgásmica. | Personales |
| Hucker y McCabe58 | 26 mujeres disfuncionales sexuales y 31 control | 3 ítems del Female Sexual Function Index (FSFI) | Los ejercicios de mindfulness y los chats en grupo se relacionan de forma positiva con la experiencia orgásmica. | Interpersonales |
| Ismail et al.59 | 347 mujeres | 3 ítems del Female Sexual Function Index (FSFI) | La diabetes no afecta significativamente a la experiencia orgásmica. El desempleo y el nivel educativo afectan de forma negativa a la experiencia orgásmica. | Personales  Psicosociales |
| Kaighobadi, Shackelford y Weekes-Shackelford60 | 453 mujeres | 2 ítems *ad hoc* sobre la experiencia orgásmica | Los problemas en la pareja se relacionan de forma negativa con la experiencia del orgasmo, aumentando el fingimiento de este. | Interpersonales |
| Kalmbach, Kingsberg y Ciesla61 | 171 mujeres | 1 ítem del Profile of Female Sexual Functioning  (PFSF) y 3 ítems Female Sexual Function Index (FSFI) | El malestar de salud general se asocia de forma negativa con la experiencia orgásmica. | Personales |
| Kaya, Gunes, Gokce y Kalkan62 | 32 mujeres con parejas con eyaculación precoz y 32 mujeres grupo control | 3 ítems del Female Sexual Function Index (FSFI) | La eyaculación precoz de la pareja afecta a la experiencia orgásmica de las mujeres. Se encuentran diferencias significativas con el grupo control. | Interpersonales |
| Kiefer, Sanchez, Kalinka e Ybarra63 | 2 muestras: 48 y 115 mujeres | 1 ítem *ad hoc* sobre la experiencia orgásmica | La sumisión inconsciente de la mujer en la relación de pareja y otros estereotipos de género se asocian de forma negativa con la experiencia orgásmica. | Personales  Interpersonales |
| King y Belsky64 | 265 mujeres | Cuestionario *ad hoc* sobre la experiencia orgásmica “Encuesta del Orgasmo Femenino” | Las características de la pareja (atractivo, olor, dominancia, agresividad, masculinidad, etc.) se asocian de forma directa con la experiencia orgásmica de las mujeres. | Interpersonales |
| King, Belsky, Mah y Binik 65 | 503 mujeres | Orgasm Rating Scale (ORS; 28 ítems) | Hay diferencias significativas entre la experiencia orgásmica en pareja y en masturbación en solitario. | Personales  Interpersonales |
| Kingsberg et al.66 | 66 mujeres | 1 ítem del Female Sexual Distress Scale/Desire Arousal Orgasm (FSDS-DAO) | La frustración se asocia de forma negativa con la experiencia del orgasmo en mujeres. | Personales |
| Klapilová, Brody, Krejčová, Husárová y Binter67 | 85 parejas (mujeres y hombres) | 1 ítem *ad hoc* sobre la experiencia orgásmica | La compatibilidad y la satisfacción sexual en la pareja se asocian con la experiencia orgásmica. La satisfacción sexual de los hombres es predicha por el orgasmo de sus parejas. | Interpersonales |
| Kohut y Fisher68 | 64 mujeres universitarias | 1 ítem *ad hoc* sobre la experiencia orgásmica | El visionado de vídeos eróticos afecta de forma positiva a la experiencia orgásmica. Los vídeos cómicos no influyen en el orgasmo. | Personales |
| Latif et al.69 | 355 mujeres con hipertensión | 3 ítems del Female Sexual Function Index (FSFI) | La hipertensión y algunos medicamentos para tratarla afectan a la experiencia orgásmica en mujeres. | Personales |
| Lee, Nazroo, O’Connor, Blake y Pandleton70 | 6.201 mujeres y hombres mayores de 50 años | 2 ítems *ad hoc*: preocupación y dificultad en la experiencia orgásmica | En los hombres, la edad y el malestar de salud influyen de forma negativa en la experiencia orgásmica. En las mujeres, no es significativa la preocupación por la experiencia orgásmica. | Personales |
| Leeners, Hengartner, Rössler, Ajdacic‐Gross y Angst71 | 299 mujeres | Entrevistas semiestructuradas con ítems sobre la experiencia orgásmica | La edad no influye en la experiencia orgásmica. La depresión, el psicoticismo, los síntomas obsesivo-compulsivos y la somatización se asocian negativamente con la experiencia orgásmica. | Personales |
| Letts, Tamlyn y Byers72 | 19 hombres en post-tratamiento de cáncer de próstata | Entrevista individual: descripción de la experiencia orgásmica | Las dificultades eréctiles afectan de forma negativa a la experiencia orgásmica. Tras la enfermedad informan de cambios negativos en la experiencia orgásmica. | Personales |
| Lorenz y Meston73 | 52 mujeres (38 con disfunciones sexuales y 14 grupo control) | 3 ítems del Female Sexual Function Index (FSFI) | Hacer ejercicio físico se asocia de forma positiva con la experiencia orgásmica. Los efectos secundarios de los antidepresivos influyen en la experiencia orgásmica. | Personales |
| Mah y Binik74 | Estudio 1: 888 mujeres y hombres  Estudio 2: 798  mujeres y hombres | Estudio 1: Orgasm Rating Scale(ORS; 60 ítems)  Estudio 2 Orgasm Rating Scale (ORS; 28 ítems) | En el estudio 1 ninguna variable sociodemográfica influye en la experiencia orgásmica. En el estudio 2 hay diferencias por sexo: las mujeres tienen puntuaciones más altas en la valoración de la experiencia orgásmica. | Personales |
| Mah y Binik75 | 798 mujeres y hombres universitarios | Orgasm Rating Scale (28 ítems) | La experiencia orgásmica se relaciona de forma positiva con la satisfacción sexual, el placer sexual y la intensidad física y psicológica global. | Personales  Interpersonales |
| Manasero et al.76 | 84 hombres con climacturia posterior a una prostatectomía | 1 ítem del International Index of Erectile Function (IIEF) | La experiencia orgásmica se ve afectada por la incontinencia urinaria. | Personales |
| McCabe y Giles77 | 404 mujeres | 3 ítems del Female Sexual Function Index (FSFI) | Niveles más bajos de intimidad sexual con la pareja se asocian de forma negativa con la experiencia orgásmica. | Interpersonales |
| McKibbin, Bates, Shackelford, Hafen y LaMunyon78 | 229 hombres universitarios heterosexuales | Cuestionario *ad hoc* sobre la experiencia orgásmica en la pareja (2 de ítems interés, 2 ítems de persistencia, 3 ítems de distrés y 2 ítems de alivio) | La percepción de interés en la experiencia orgásmica de la pareja durante la relación sexual está asociada de forma positiva con la satisfacción sexual. | Interpersonales |
| Meston79 | 32 mujeres | 3 ítems del Female Sexual Function Index (FSFI) | La autoconciencia privada, es decir, la conciencia del propio cuerpo y de los estados internos, se asocia positivamente con la experiencia orgásmica. | Personales |
| Meston, Rellini y McCall80 | 62 mujeres universitarias | 3 ítems del Female Sexual Function Index (FSFI) | Hay una relación positiva entre la experiencia orgásmica y la excitación sexual subjetiva y objetiva (pulso vaginal). | Personales |
| Mogorovich et al.81 | 1.411 hombres sometidos a cirugía prostática | 5 ítems sobre experiencia orgásmica | La experiencia orgásmica se ve afectada en pacientes sometidos a prostatectomía radical. | Personales |
| Montanari et al.82 | 182 mujeres diagnosticadas con endometriosis | 4 ítems del Sexual Health Outcomes in Women Questionnaire (SHOW-Q) | La dispareunia afecta negativamente a la experiencia orgásmica en mujeres con endometriosis. | Personales |
| Muehlenhard y Shippee83 | 101 mujeres y 180 hombres universitarios | Cuestionario *ad hoc* sobre la experiencia orgásmica | La evitación de consecuencias negativas (lastimar sentimientos) y la obtención de consecuencias positivas (agradar a la pareja) influyen negativamente en la experiencia orgásmica y en su fingimiento. | Interpersonales |
| Nascimento, Maia, Nardi y Silva84 | 157 mujeres diagnosticadas con hipertensión | 3 ítems del Female Sexual Function Index (FSFI) | En el 55,4% de los casos la hipertensión se asocia de manera negativa a la experiencia orgásmica. La ansiedad y la depresión se asocian al trastorno orgásmico. | Personales |
| Ojanlatva et al.85 | 5510 mujeres | 1 ítem *ad hoc* sobre la experiencia orgásmica | La edad y no estar casada afectan de forma negativa a la experiencia orgásmica. Vivir en la ciudad (vs. rural) afecta de forma negativa a la experiencia orgásmica. | Personales  Interpersonales  Psicosociales |
| Opperman, Braun, Clarke y Rogers86 | 119 hombres y mujeres heterosexuales | 5 ítems *ad hoc* sobre experiencia orgásmica: propósito, pareja, placer, respuesta fisiológica y fingimiento | Tanto en hombres como en mujeres, el contexto social, las relaciones sexuales en pareja y la historia sexual tienen una asociación positiva con la experiencia orgásmica. | Interpersonales  Psicosociales |
| Palaniappan, Mintz y Heatherly87 | 47 mujeres | 3 ítems del Female Sexual Function Index (FSFI) | La lectura de libros eróticos y de autoayuda se asocia positivamente con la experiencia orgásmica. | Personales |
| Paterson, Amsel y Binik88 | 26 mujeres | 3 ítems del Female Sexual Function Index  (FSFI) y versión modificada de la Orgasm Rating Scale (ORS) | No hay diferencias entre la experiencia orgásmica en la masturbación y en relaciones sexuales con una pareja. La sensibilidad al dolor en las relaciones sexuales está asociada negativamente con la experiencia del orgasmo. | Personales  Interpersonal |
| Paterson, Jin, Amsel y Binik89 | 76 mujeres y hombres | Orgasm Rating Scale (ORS; 40 ítems) | La experiencia orgásmica se asocia con la excitación sexual subjetiva y la saciedad sexual, más en hombres que en mujeres. La temperatura genital disminuye en hombres más que en mujeres durante la experiencia orgásmica. | Personales |
| Peixoto y Nobre90 | 500 mujeres | 3 ítems del Female Sexual Function Index (FSFI) | La edad es un predictor negativo de la experiencia orgásmica. El nivel educativo no afecta a la experiencia orgásmica. | Personales  Psicosociales |
| Prause91 | 38 mujeres universitarias | 1 ítem *ad hoc* sobre experiencia orgásmica | La experiencia orgásmica se asocia a mayor deseo sexual hacia la pareja, mayor deseo de masturbación y mayor excitación sexual en respuesta a un vídeo erótico. | Personales  Interpersonales |
| Prause, Kuang, Lee y Miller92 | 88 mujeres universitarias | Cuestionario *ad hoc* sobre la experiencia orgásmica | La experiencia orgásmica se asocia con mayor deseo y excitación sexual, en cambio no se asocia con angustia sexual, depresión ni ansiedad. | Personales  Interpersonales |
| Puts, Welling, Burriss y Dawood93 | 117 parejas de mujeres y hombres heterosexuales | 6 ítems *ad hoc* sobre la experiencia orgásmica | El atractivo, la masculinidad y la dominancia de los hombres afectan de forma positiva a la experiencia orgásmica en pareja de las mujeres. | Interpersonales |
| Richters, de Visser, Rissel y Smith94 | 19.307 mujeres y hombres | Encuestas telefónicas con ítems sobre la experiencia orgásmica | Las mujeres relacionan la experiencia orgásmica con la estimulación manual y el sexo oral en la relación de pareja; esto no ocurre en los hombres. | Personales  Interpersonales |
| Rosen, Heiman, Long, Fisher y Sand95 | 1.009 parejas de mujeres y hombres | 1 ítem del National Health and Social Life Survey (NHSLS) | La edad, la duración de la relación y las enfermedades crónicas se asocian de forma negativa con la experiencia orgásmica. | Personales  Interpersonales |
| Safarinejad, Shafieid y Safarinejad96 | 186 mujeres en tratamiento de cáncer de mama y 204 controles | 3 ítems del Female Sexual Function Index (FSFI) | Se encuentran diferencias en la experiencia orgásmica entre las mujeres con cáncer de mama y las del grupo control. | Personales |
| Salisbury y Fisher97 | 24 mujeres y 21 hombres universitarios | Cuestionario *ad hoc* sobre la experiencia orgásmica (16 ítems) | En las mujeres, los aspectos psicológicos tienen una asociación intensa con la experiencia del orgasmo; en los hombres son los aspectos físicos los más relevantes.  El tipo de relación de pareja y los pensamientos acerca de la relación se asocian de forma positiva con la experiencia orgásmica en ambos sexos. | Personales  Interpersonales |
| Sánchez y Kiefer98 | 320 mujeres y hombres heterosexuales | 2 ítems *ad hoc* sobre la experiencia orgásmica | En ambos sexos, la experiencia orgásmica se relaciona de manera negativa con la preocupación por la apariencia física y de manera positiva con estar en una relación de pareja. | Personales  Interpersonales |
| Séguin y Milhausen99 | 230 hombres | Motivations for Feigning Orgasm Scale (MFOS) | La experiencia orgásmica se ve afectada por una experiencia sexual deficiente y por la mala elección de la pareja, siendo consecuente el fingimiento del orgasmo. A su vez, éste se asocia con niveles más bajos de deseo y satisfacción sexual. | Personales  Interpersonales |
| Séguin, Milhausen y Kukkonen100 | 147 mujeres y hombres | Feigning Orgasms Scale (FOS) | La incomodidad, la inseguridad y los problemas en la relación de pareja afectan a la experiencia orgásmica, siendo esta relación más significativa en hombres que en mujeres. | Personales  Interpersonales |
| Sela, Weekes-Shackelford, Shackelford y Pham101 | 439 mujeres heterosexuales | 1 ítem *ad hoc* sobre la experiencia orgásmica en la relación sexual con la pareja | La percepción del atractivo de la pareja influye en la experiencia orgásmica en las relaciones sexuales. | Interpersonales |
| Shackelford et al.102 | 388 mujeres heterosexuales | 1 ítem *ad hoc* sobre la experiencia orgásmica | El atractivo de la pareja masculina se asocia con la experiencia orgásmica de mujeres heterosexuales. | Interpersonales |
| Siddons, Wootten y Costello103 | 60 hombres con cáncer de próstata | Ítem sobre satisfacción con el orgasmo del Derogatis Interview for Sexual Functioning—Self-Report (DISF-SR) | La terapia cognitiva-conductual tiene efectos positivos en la experiencia orgásmica de los pacientes con cáncer. | Personales |
| Simiyon, Chandra y Desai104 | 63 mujeres con esquizofrenia | 3 ítems del Female Sexual Function Index (FSFI) | Los síntomas de la esquizofrenia se asocian de forma negativa con la experiencia orgásmica. | Personales |
| Smith, Jozkowski y Sanders105 | 1001 mujeres | 1 ítem *ad hoc* sobre la experiencia orgásmica | La experiencia orgásmica se ve afectada en mujeres que utilizan anticonceptivos hormonales. | Personales |
| Staples, Rellini y Roberts106 | 32 mujeres con historia de abuso sexual en la infancia y 22 controles | 3 ítems del Female Sexual Function Index (FSFI) | La experiencia orgásmica se ve influida de forma negativa por los antecedentes de abuso sexual. La evitación de la cercanía y de la participación en la relación sexual se relaciona de forma negativa con la experiencia orgásmica. | Personales  Interpersonales |
| Stephenson, Hughan y Meston107 | 101 mujeres con historia de abuso sexual en la infancia y 71 controles | 3 ítems del Female Sexual Function Index (FSFI) | La experiencia orgásmica se relaciona con la angustia sexual en el contexto de pareja en mujeres con historia de abuso sexual. | Personales  Interpersonales |
| Stephenson y Meston108 | 200 mujeres | 3 ítems del Female Sexual Function Index (FSFI) | La experiencia del orgasmo se relaciona de forma positiva con satisfacción, excitación y lubricación. | Interpersonales |
| Stoeber y Harvey109 | 336 mujeres | 3 ítems del Female Sexual Function Index (FSFI) | El perfeccionismo y el seguimiento estricto de las normas con la pareja sexual afecta de forma negativa a la experiencia orgásmica. | Interpersonales |
| Tuinman et al.110 | 93 hombres con cáncer testicular | 1 ítem del International Index of Erectile Function (IIEF) | Los síntomas depresivos afectan a la experiencia orgásmica de los pacientes. Se observan cambios significativos en la experiencia orgásmica antes-durante y tras el tratamiento. | Personales |
| Valadares, Pinto‐Neto, de Souza, Osis y da Costa Paiva111 | 378 mujeres | 1 ítem *ad hoc* sobre la experiencia orgásmica | Tener una pareja sexual, sentirse bien con uno mismo y los sofocos se asocian con baja experiencia orgásmica en mujeres de mediana edad. | Personales  Interpersonales |
| Van Anders y Dunn112 | 86 mujeres y 91 hombres | Orgasm Rating Scale (40 ítems) | En hombres no hay relación entre los niveles hormonales (estradiol y testosterona) y la experiencia orgásmica. En mujeres existe una relación positiva entre niveles de testosterona y experiencia orgásmica positiva | Personales |
| Van de Nieuwenhof et al.113 | 215 mujeres con liquen escleroso (enfermedad piel genital) y 60 controles | 3 ítems del Female Sexual Function Index (FSFI) | La enfermedad dermatológica influye de forma negativa en la experiencia orgásmica. | Personales |
| Van den Brick, Smeets, Hessen y Woertman114 | 399 mujeres universitarias | 3 ítems del Female Sexual Function Index (FSFI) | El apego de evitación en un contexto de pareja está asociado negativamente a la experiencia orgásmica. La apreciación positiva del cuerpo se relaciona de forma positiva con la experiencia orgásmica. | Personales  Interpersonal |
| Villeda-Sandoval et al.115 | 300 mujeres | 3 ítems del Female Sexual Function Index (FSFI) | La experiencia orgásmica se ve afectada por la ansiedad, la depresión, la imagen corporal y las actitudes negativas hacia el sexo. | Personales |
| Weiss y Brody116 | 2.360 mujeres | 1 ítem *ad hoc* sobre la experiencia orgásmica | La experiencia orgásmica está más asociada con la duración del coito pene-vagina que con la duración de los juegos preliminares en pareja. La edad se asocia de forma negativa con la experiencia orgásmica. | Personales  Interpersonales |
| Yen Chiang y Chiang117 | 41 mujeres y hombres | Entrevistas individuales | La experiencia orgásmica está relacionada positivamente con el bienestar fisiológico y la satisfacción psicológica. También se asocia de forma positiva con deseo sexual y con amor. | Personales  Interpersonales |
| Yeoh et al.118 | 150 mujeres y 119 hombres infértiles | 3 ítems del Female Sexual Function Index (FSFI) y 1 ítem del International Index of Erectile Function (IIEF) | La experiencia orgásmica se ve afectada por la infertilidad en la relaciones de pareja. | Interpersonales |
| Yu, Roane, Miner, Fleming y Rogers119 | 21 hombres con Parkinson | 6 ítems del Derogatis Interview for Sexual Function (DISF-SR) | La enfermedad de Parkinson afecta de forma negativa a la experiencia orgásmica. | Personales |
| Zajaczkowska, Zwierzchowska, Kusmierek, Bobinska y Talarowska120 | 30 mujeres con trastornos neuróticos, somatoformes o estrés y 30 controles | 9 ítems del Mell-Krat Scale (SFK/K Scale) | Los trastornos neuróticos, somatoformes y el estrés afectan a la experiencia orgásmica. Hay diferencias significativas con las mujeres controles. | Personales |
| Zietsch y Santtila121 | 8.447 mujeres (645 pares de gemelas y 1.751 pares de hermanas) | 2 ítems *ad hoc* sobre la experiencia orgásmica | La fertilidad y la frecuencia de las relaciones sexuales en pareja no se asocian con la experiencia orgásmica. | Personales  Interpersonales |

**REFERENCIAS**

1. Abedi P, Afrazeh M, Javadifar N, Saki A. The relation between stress and sexual function and satisfaction in reproductive-age women in Iran: a cross-sectional study. J Sex Marital Ther. 2015;41:384-90.
2. Barrientos JE, Páez D. Psychosocial variables of sexual satisfaction in Chile. J Sex Marital Ther. 2006;32:351-68.
3. Beaber TE, Werner PD. The relationship between anxiety and sexual functioning in lesbians and heterosexual women. J Homosex. 2009;56:639-54.
4. Bellamy G, Gott M, Hinchliff S. Women's understandings of sexual problems: findings from an in‐depth interview study. J Clin Nurs. 2013;22:3240-48.
5. Boquiren VM, Esplen MJ, Wong J, Toner B, Warner E, Malik N. Sexual functioning in breast cancer survivors experiencing body image disturbance. Psychooncology. 2016; 25: 66-76.
6. Brewer G, Abell L, Lyons M. Machiavellianism, pretending orgasm, and sexual intimacy. Pers Individ Dif. 2016; 96:155-58.
7. Brewer G y Hendrie CA. Evidence to suggest that copulatory vocalizations in women are not a reflexive consequence of orgasm. Arch Sex Behav. 2011;40:559-564.
8. Brody S. Intercourse orgasm consistency, concordance of women's genital and subjective sexual arousal, and erotic stimulus presentation sequence. J Sex Marital Ther.2007a;33:31-39.
9. Brody S. Vaginal orgasm is associated with better psychological function. Sex Relation Ther. 2007b; 22:173-91.
10. Brody S, Costa RM. Vaginal orgasm is associated with less use of immature psychological defense mechanisms. J Sex Med. 2008;5:1167.
11. Brody S, Houde S, Hess U. Greater tactile sensitivity and less use of immature psychological defense mechanisms predict women's penile‐vaginal intercourse orgasm. J Sex Med. 2010;7:3057-3065.
12. Brody S, Klapilova K, Krejčová L. More frequent vaginal orgasm is associated with experiencing greater excitement from deep vaginal stimulation. J Sex Med. 2013;10:1730-36.
13. Brody S, Weiss P. Vaginal orgasm is associated with vaginal (not clitoral) sex education, focusing mental attention on vaginal sensations, intercourse duration, and a preference for a longer penis. J Sex Med. 2010;7:2774-81.
14. Brody S, Weiss P. Simultaneous penile–vaginal intercourse orgasm is associated with satisfaction (sexual, life, partnership, and mental health). J Sex Med. 2011;8:734-41.
15. Brody S, Weiss P. Erectile dysfunction and premature ejaculation: Interrelationships and psychosexual factors. J Sex Med. 2015;12:398-404.
16. Bueno-Robles LS, Soto-Lesmes VI. Salud sexual y alteraciones emocionales en mujeres colombianas con cáncer de mama. Psicooncología, 2015;12:405.
17. Burri AV, Cherkas LM, Spector TD. Emotional intelligence and its association with orgasmic frequency in women. J Sex Med. 2009;6:1930-37.
18. Carvalheira A, Leal I. Masturbation among women: Associated factors and sexual response in a Portuguese community sample. J Sex Marital Ther. 2013;39:347-67.
19. Carvalheira A,Santana R. Individual and relationship factors associated with the self-identified inability to experience orgasm in a community sample of heterosexual men from three European countries. J Sex Marital Ther. 2016;42:257-66.
20. Carvalho J, Vieira AL, Nobre P. Latent structures of female sexual functioning. Arch Sex Behav. 2012;41:907-17.
21. Chou NH, Huang YJ, Jiann BP. The impact of illicit use of amphetamine on male sexual functions. J Sex Med. 2015;12:1694-702.
22. Christie KM, Meyerowitz BE, Maly RC. Depression and sexual adjustment following breast cancer in low‐income Hispanic and non‐Hispanic white women. Psychooncology. 2010;19:1069-77.
23. Cohen DL, Belsky J. Avoidant romantic attachment and female orgasm: Testing an emotion-regulation hypothesis. Attach Hum Dev. 2008;10:1-10.
24. Costa RM, Brody S. Women's relationship quality is associated with specifically penile-vaginal intercourse orgasm and frequency. J Sex Marital Ther. 2007;33:319-27.
25. Costa RM, Brody S. Immature defense mechanisms are associated with lesser vaginal orgasm consistency and greater alcohol consumption before sex. J Sex Med. 2010;7:775-86.
26. Costa RM, Brody S. Anxious and avoidant attachment, vibrator use, anal sex, and impaired vaginal orgasm. J Sex Med. 2011;8:2493-2500.
27. Costa RM, Brody S. Greater Resting Heart Rate Variability Is Associated with Orgasms Through Penile–Vaginal Intercourse, But Not with Orgasms from Other Sources. J Sex Med. 2012;9:188-97.
28. Costa RM, Oliveira TF, Pestana J, Costa D. Self-transcendence is related to higher female sexual desire. Pers Individ Dif. 2016;96:191-97.
29. Costa RM, Pestana J, Costa D y Wittmann M. Altered states of consciousness are related to higher sexual responsiveness. Conscious Cogn. 2016;42:135-41.
30. Cuntim M, Nobre P. The role of cognitive distraction on female orgasm. Sexologies. 2011;2011:212-14.
31. Cyranowski JM, Frank E, Cherry C, Houck P, Kupfer DJ. Prospective assessment of sexual function in women treated for recurrent major depression. J Psychiatr Res. 2004;38:267-73.
32. De Sutter P, Day J, Adam F. Who are the orgasmic women? Exploratory study among a community sample of French-speaking women. Sexologies. 2014;23:51-7.
33. Denes A, Afifi TD. Pillow talk and cognitive decision-making processes: Exploring the influence of orgasm and alcohol on communication after sexual activity. Commun Monogr. 2014;81:333-58.
34. Denis A, Sung-Mook H. Sexual functioning of women with HIV: A comparison with non-HIV women. Can J Hum Sex. 2003;12:97.
35. Dewinter J, Vermeiren RR, Vanwesenbeeck I, Van Nieuwenhuizen C. Adolescent boys with autism spectrum disorder growing up: follow-up of self-reported sexual experience. Eur Child Adolesc Psychiatry. 2016;25:969-78.
36. Dewinter J, Vermeiren RR, Vanwesenbeeck I, Van Nieuwenhuizen C. Parental awareness of sexual experience in adolescent boys with autism spectrum disorder. J Autism Dev Disord. 2016;46:713-19.
37. Dickstein JB, Goldstein SW, Tkachenko N, Kreppner W. Correlation of question 15 of the FSDS‐DAO with clinician evaluation of female orgasmic disorder. J Sex Med. 2013;10:2251-54.
38. Dunkley CR, Dang SS, Chang SC, Gorzalka BB. Sexual Functioning in Young Women and Men: Role of Attachment Orientation. J Sex Marital Ther. 2016;42:413-30.
39. Ellsworth RM, Bailey DH. Human female orgasm as evolved signal: A test of two hypotheses. Arch Sex Behav. 2013;42:1545-54.
40. Fahs B. Coming to power: women's fake orgasms and best orgasm experiences illuminate the failures of (hetero) sex and the pleasures of connection. Cult Health Sex. 2014;16:974-88.
41. Flynn KE, Jeffery DD, Keefe FJ, Porter LS, Shelby RA, Fawzy MR et al. Sexual functioning along the cancer continuum: Focus group results from the Patient‐Reported Outcomes Measurement Information System (PROMIS). Psychooncology. 2011;20:378-86.
42. Forbes MK, Baillie AJ, Schniering CA. Should sexual problems be included in the internalizing spectrum? A comparison of dimensional and categorical models. J Sex Marital Ther. 2016;42:70-90.
43. Frohlich P, Meston C. Sexual functioning and self‐reported depressive symptoms among college women. J Sex Res. 2002;39:321-25.
44. Galinsky AM. Sexual touching and difficulties with sexual arousal and orgasm among US older adults. Arch Sex Behav. 2012;41:875-90.
45. Gallup GG, Ampel BC, Wedberg N, Pogosjan A. Do orgasms give women feedback about mate choice? Evol Psychol. 2014;12.
46. Garcia JR, Lloyd EA, Wallen K, Fisher HE. Variation in orgasm occurrence by sexual orientation in a sample of US singles. J Sex Med. 2014;11:2645-52.
47. Gilbert E, Ussher JM, Perz J, Wong WT, Hobbs K, Mason C. Men's experiences of sexuality after cancer: A material discursive intra-psychic approach. Cult Health Sex. 2013;15:881-95.
48. Goldey KL, Posh AR, Bell SN, Van Anders SM. Defining Pleasure: A Focus Group Study of Solitary and Partnered Sexual. Arch Sex Behav. 2016;45:2137-54.
49. González M, Viáfara G, Caba F, Molina T, Ortiz C. Libido and orgasm in middle-aged woman. Maturitas. 2006;53:1-10.
50. Hamzaoui S, Mammri A, Ouanes S, Meziou O, Zalila H. Assessment of sexual function among women consultant for first major depressive disorder. Sexologies. 2016;25:166-72.
51. Haning RV, O’Keefe SL, Randall EJ, Kommor MJ, Baker E, Wilson R. Intimacy, orgasm likelihood, and conflict predict sexual satisfaction in heterosexual male and female respondents. J Sex Marital Ther. 2007;33:93-113.
52. Harris JM, Cherkas LF, Kato BS, Heiman JR, Spector TD. Normal variations in personality are associated with coital orgasmic infrequency in heterosexual women: A population‐based study. J Sex Med. 2008;5:1177-83.
53. Harris EZ, Hornsey MJ, Barlow FK. On the link between benevolent sexism and orgasm frequency in heterosexual women. Arch Sex Behav. 2016;45:1923-31.
54. Herbenick D, Fortenberry JD. Exercise-induced orgasm and pleasure among women. Sex Relation Ther. 2011:26:373-88.
55. Herbenick D, Reece M, Sanders S, Dodge B, Ghassemi A, Fortenberry JD. Prevalence and characteristics of vibrator use by women in the United States: Results from a nationally representative study. J Sex Med. 2009;67:1857-66.
56. Höglund J, Jern P, Sandnabba NK, Santtila P. Finnish women and men who self-report no sexual attraction in the past 12 months: Prevalence, relationship status, and sexual behavior history. Arch Sex Behav. 2014;43:879-89.
57. Hou CL, Zang Y, Rosen RC, Cai MY, Li Y, Jia FJ et al. Sexual dysfunction and its impact on quality of life in Chinese patients with schizophrenia treated in primary care. Compr Psychiatry. 2016;65:116-21.
58. Hucker A, McCabe MP. Incorporating mindfulness and chat groups into an online cognitive behavioral therapy for mixed female sexual problems. J Sex Res. 2015;52:627-39.
59. Ismail AH, Baw R, Sidi H, Guan NC, Midin M, Jaafar NR et al. Orgasmic dysfunction among Malay diabetic women in Malaysia. Compr Psychiatry. 2014;55:29-33.
60. Kaighobadi F, Shackelford TK, Weekes-Shackelford VA. Do women pretend orgasm to retain a mate? Arch Sex Behav. 2012; 1121-25.
61. Kalmbach DA, Kingsberg SA, Ciesla JA. How changes in depression and anxiety symptoms correspond to variations in female sexual response in a nonclinical sample of young women: a daily diary study. J Sex Med. 2014;11:2915-27.
62. Kaya C, Gunes M, Gokce AM, Kalkan S. Is sexual function in female partners of men with premature ejaculation compromised? J Sex Marital Ther. 2015;41:379-83.
63. Kiefer AK, Sanchez DT, Kalinka CJ, Ybarra O. How women’s nonconscious association of sex with submission relates to their subjective sexual arousability and ability to reach orgasm. Sex Roles, 2006;55:83-94.
64. King R, Belsky J. A typological approach to testing the evolutionary functions of human female orgasm. Arch Sex Behav. 2012;41:1145-60.
65. King R, Belsky J, Mah K, Binik Y. Are there different types of female orgasm?. Arch Sex Behav. 2011;40:865-75.
66. Kingsberg SA, Tkachenko N, Lucas J, Burbrink A, Kreppner W, Dickstein J. Characterization of orgasmic difficulties by women: focus group evaluation. J Sex Med. 2013;10:2242-50.
67. Klapilová K, Brody S, Krejčová J, Husárová B, Binter J. Sexual satisfaction, sexual compatibility, and relationship adjustment in couples: the role of sexual behaviors, orgasm, and men's discernment of women's intercourse orgasm. J Sex Med. 2015;12_667-75.
68. Kohut T, Fisher WA. The impact of brief exposure to sexually explicit video clips on partnered female clitoral self-stimulation, orgasm and sexual satisfaction. Can J Hum Sex. 2013;22:40-50.
69. Latif RA, Muhamad R, Ann AY, Sidi H, Jaafar NR, Midin M et al. Duration of hypertension and antihypertensive agents in correlation with the phases of female sexual response cycle. Compr Psychiatry. 2014;55:7-12.
70. Lee DM, Nazroo J, O’Connor DB, Blake M, Pendleton N. Sexual health and well-being among older men and women in England: findings from the English Longitudinal Study of Ageing. Arch Sex Behav. 2016;45:133-44.
71. Leeners B, Hengartner MP, Rössler W, Ajdacic-Gross V, Angst J. The role of psychopathological and personality covariates in orgasmic difficulties: a prospective longitudinal evaluation in a cohort of women from age 30 to 50. J Sex Med. 2014;11:2928-37.
72. Letts C, Tamblyn K, Byers ES. Exploring the impact of prostate cancer on men's sexual well-being. J Psychosoc Oncol. 2010;28:490-510.
73. Lorenz TA, Meston CM. Exercise improves sexual function in women taking antidepressants: results from a randomized crossover trial. Depress Anxiety. 2014; 31:188-95.
74. Mah K, Binik YM. Do all orgasms feel alike? Evaluating a two‐dimensional model of the orgasm experience across gender and sexual context. J Sex Res. 2002;39:104-13.
75. Mah K, Binik YM. Are orgasms in the mind or the body? Psychosocial versus physiological correlates of orgasmic pleasure and satisfaction. J Sex Marital Ther. 2005;31:187-200.
76. Manassero F, Di Paola G, Paperini D, Mogorovich A, Pistolesi D, Valent F et al. Orgasm‐Associated incontinence (climacturia) after bladder neck‐sparing radical prostatectomy: Clinical and video‐urodynamic evaluation. J Sex Med. 2012;9:2150-56.
77. McCabe MP y Giles K. Differences between sexually functional and dysfunctional women in childhood experiences and individual and relationship domains. Int J Sex Health. 2012;24:181-94.
78. McKibbin WF, Bates VM, Shackelford TK, Hafen, CA, LaMunyon CW. Risk of sperm competition moderates the relationship between men’s satisfaction with their partner and men’s interest in their partner’s copulatory orgasm. Pers Individ Dif. 2010;49:961-66.
79. Meston CM. The effects of state and trait self-focused attention on sexual arousal in sexually functional and dysfunctional women. Behav Res Ther. 2006;44:515-32.
80. Meston CM, Rellini AH y McCall K. The sensitivity of continuous laboratory measures of physiological and subjective sexual arousal for diagnosing women with sexual arousal disorder. J Sex Med. 2010;7:938-50.
81. Mogorovich A, Nilsson AE, Tyritzi SI, Carlsson S, Jonsson M, Haendler L et al. Radical prostatectomy, sparing of the seminal vesicles, and painful orgasm. J Sex Med. 2013;10:1417-23.
82. Montanari G, Di Donato N, Benfenati A, Giovanardi G, Zannoni L, Vicenzi C et al. Women with deep infiltrating endometriosis: sexual satisfaction, desire, orgasm, and pelvic problem interference with sex. J Sex Med. 2013;10:1559-66.
83. Muehlenhard CL, Shippee SK. Men's and women's reports of pretending orgasm. J Sex Res. 2010;47:552-67.
84. Nascimento ER, Maia AC, Nardi AE, Silva AC. Sexual dysfunction in arterial hypertension women: The role of depression and anxiety. J Affect Disord. 2015;181:96-100.
85. Ojanlatva A, Helenius H, Jokinen K, Sundell J, Mäkinen J, Rautava P. Sexual activity and background variables among Finnish middle-aged women. Am J Health Behav. 2004;28:302-15.
86. Opperman E, Braun V, Clarke V, Rogers C. “It feels so good it almost hurts”: Young adults' experiences of orgasm and sexual pleasure. J Sex Res. 2014;51:503-15.
87. Palaniappan M, Mintz L, Heatherly R. Bibliotherapy interventions for female low sexual desire: erotic fiction versus self-help. Sex Relation Ther. 2016;31:344-58.
88. Paterson L, Amsel R, Binik YM. Pleasure and pain: The effect of (almost) having an orgasm on genital and nongenital sensitivity. J Sex Med. 2013;10:1531-44.
89. Paterson L, Jin ES, Amsel R, Binik YM. Gender similarities and differences in sexual arousal, desire, and orgasmic pleasure in the laboratory. J Sex Res. 2014;51:801-13.
90. Peixoto MM, Nobre P. Prevalence and sociodemographic predictors of sexual problems in Portugal: A population-based study with women aged 18 to 79 years. J Sex Marital Ther. 2015;41:169-80.
91. Prause N. The human female orgasm: Critical evaluations of proposed psychological sequelae. Sex Relation Ther. 2011;26:315-28.
92. Prause N, Kuang L, Lee P, Miller G. Clitorally stimulated orgasms are associated with better control of sexual desire, and not associated with depression or anxiety, compared with vaginally stimulated orgasms. J Sex Med. 2016;13:1676-85.
93. Puts DA, Welling LL, Burriss RP, Dawood K. Men's masculinity and attractiveness predict their female partners' reported orgasm frequency and timing. Evol Hum Behav. 2012;33:1-9.
94. Richters J, de Visser R, Rissel C, Smith A. Sexual practices at last heterosexual encounter and occurrence of orgasm in a national survey. J Sex Res. 2006;43:217-26.
95. Rosen RC, Heiman JR, Long JS, Fisher WA, Sand MS. Men with sexual problems and their partners: findings from the International Survey of Relationships. Arch Sex Behav. 2016;45:159-73.
96. Safarinejad MR, Shafiei N, Safarinejad S. Quality of life and sexual functioning in young women with early‐stage breast cancer 1 year after lumpectomy. Psychooncology. 2013;22:1242-48.
97. Salisbury CM, Fisher WA. “Did you come?” A qualitative exploration of gender differences in beliefs, experiences, and concerns regarding female orgasm occurrence during heterosexual sexual interactions. J Sex Res. 2013;51:616-31.
98. Sánchez DT, Kiefer AK. Body concerns in and out of the bedroom: Implications for sexual pleasure and problems. Arch Sex Behav. 2007;36:808-20.
99. Séguin LJ, Milhausen RR. Not all fakes are created equal: examining the relationships between men's motives for pretending orgasm and levels of sexual desire, and relationship and sexual satisfaction. Sex Relation Ther. 2016;31:159-75.
100. Séguin LJ, Milhausen RR, Kukkonen T. The development and validation of the motives for feigning orgasms scale. Can J Hum Sex. 2015; 24:31-48.
101. Sela Y, Weekes-Shackelford VA, Shackelford TK, Pham MN. Female copulatory orgasm and male partner’s attractiveness to his partner and other women. Pers Individ Dif. 2015;79:152-56.
102. Shackelford TK, Weekes-Shackelford VA, LeBlanc GJ, Bleske AL, Euler HA, Hoier S. Female coital orgasm and male attractiveness. Hum Nat. 2000;11:299-306.
103. Siddons HM, Wootten AC, Costello AJ. A randomised, wait‐list controlled trial: evaluation of a cognitive–behavioural group intervention on psycho‐sexual adjustment for men with localised prostate cancer. Psychooncology. 2013;22:2186-92.
104. Simiyon M, Chandra PS, Desai G. Sexual dysfunction among women with Schizophrenia—A cross sectional study from India. Asian J Psychiatr. 2016;24:93-8.
105. Smith NK, Jozkowski KN, Sanders SA. Hormonal contraception and female pain, orgasm and sexual pleasure. J Sex Med. 2014;11:462-70.
106. Staples J, Rellini AH, Roberts SP. Avoiding experiences: sexual dysfunction in women with a history of sexual abuse in childhood and adolescence. Arch Sex Behav. 2012;41:341-50.
107. Stephenson KR, Hughan CP, Meston CM. Childhood sexual abuse moderates the association between sexual functioning and sexual distress in women. Child Abuse Negl. 2012;36:180-89.
108. Stephenson KR, Meston CM. The association between sexual costs and sexual satisfaction in women: An exploration of the Interpersonal Exchange Model of Sexual Satisfaction. Can J Hum Sex. 2011;20:31.
109. Stoeber J, Harvey LN. Multidimensional sexual perfectionism and female sexual function: A longitudinal investigation. Arch Sex Behav. 2016;45:2003-14.
110. Tuinman MA, Hoekstra HJ, Vidrine DJ, Gritz ER, Sleijfer DT, Fleer J, et al. Sexual function, depressive symptoms and marital status in nonseminoma testicular cancer patients: a longitudinal study. Psychooncology. 2010;19:238-47.
111. Valadares AL, Pinto-Neto AM, de Souza MH, Osis MJ, da Costa Paiva LH. The prevalence of the components of low sexual function and associated factors in middle‐aged women. J Sex Med. 2011;8:2851-58.
112. Van Anders SM, Dunn EJ. Are gonadal steroids linked with orgasm perceptions and sexual assertiveness in women and men? Horm Behav. 2009;56:206-13.
113. Van de Nieuwenhof HP, Meeuwis KA, Nieboer TE, Vergeer MC, Massuger LF, De Hullu JA. The effect of vulvar lichen sclerosus on quality of life and sexual functioning. J Psychosom Obstet Gynaecol. 2010;31:279-84.
114. Van den Brink F, Smeets MA, Hessen DJ, Woertman L. Positive body image and sexual functioning in Dutch female university students: The role of adult romantic attachment. Arch Sex Behav. 2016; 45;1217-26.
115. Villeda-Sandoval CI, Calao-Pérez M, Enríquez González AB, González-Cuenca E, Ibarra-Saavedra R, Sotomayor M, et al. Orgasmic dysfunction: prevalence and risk factors from a cohort of young females in Mexico. J Sex Med. 2014;1505-11.
116. Weiss P, Brody S. Women's partnered orgasm consistency is associated with greater duration of penile–vaginal intercourse but not of foreplay. J Sex Med. 2009;6:135-41.
117. Yen Chiang A, Chiang WY. Behold, I am Coming Soon! A study on the conceptualization of sexual orgasm in 27 languages. Metaphor Symb. 2016;31:131-47.
118. Yeoh SH, Razali R, Sidi H, Razi ZR, Midin M, Jaafar NR et al. The relationship between sexual functioning among couples undergoing infertility treatment: a pair of perfect gloves. Compr Psychiatry. 2014;55:S1-S6.
119. Yu M, Roane DM, Miner CR, Fleming M, Rogers JD. Dimensions of sexual dysfunction in Parkinson disease. Am J Geriatr Psychiatry. 2004;12:221-26.
120. Zajaczkowska M, Zwierzchowska J, Kusmierek M, Bobinska K, Talarowska M. Analysis of sexual functioning in women with neurotic disorders based on the Mell-Krat scale. Med Sci Tech. 2013;54:130.35.
121. Zietsce BP, Santtila P. No direct relationship between human female orgasm rate and number of offspring. Anim Behav. 2013;86:253-55.
